# Supplementary material
Source: MDPI journal article supplement (https://www.mdpi.com/2673-9992/3/1/10)
Supplement: s1 [file s1]

# Increased replication stress sensitises high risk neuroblastoma cells to ATR and PARP inhibition

Harriet Southgate, Lindi Chen, Deborah A. Tweddle and Nicola Curtin  
Newcastle University Centre for Cancer Research, Translational and Clinical Research Institute, Newcastle upon Tyne, U.K.  
Contact information: [h.southgate2@newcastle.ac.uk](mailto:h.southgate2@newcastle.ac.uk)

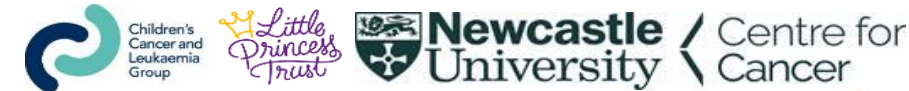

## Background

- Neuroblastoma (NB) is a rare childhood cancer, half of which are high risk and a survival rate of 50%
- MYCN* amplification and/or *ATM* loss through 11q deletion are common features of high-risk NB and may increase replication stress (RS).
- RS is a state in which the DNA replication machinery cannot maintain the rate of DNA synthesis resulting in increased replication fork stalling and collapse, chromosome instability and ultimately cell death.
- Cells with high levels of RS are acutely dependent on the ATR signalling pathway for survival.

## Aims

- To determine if *MYCN* amplification or *ATM* loss identifies cells which are sensitive to ATR inhibition (ATRi).
- To examine the effect of ATRi on PARP inhibitor (PARPi) cytotoxicity and PARPi-induced RS, cell cycle arrest and HRR activity.

## Results

### 1. NB cell lines with high MYCN or low ATM protein expression have increased sensitivity to ATR inhibition

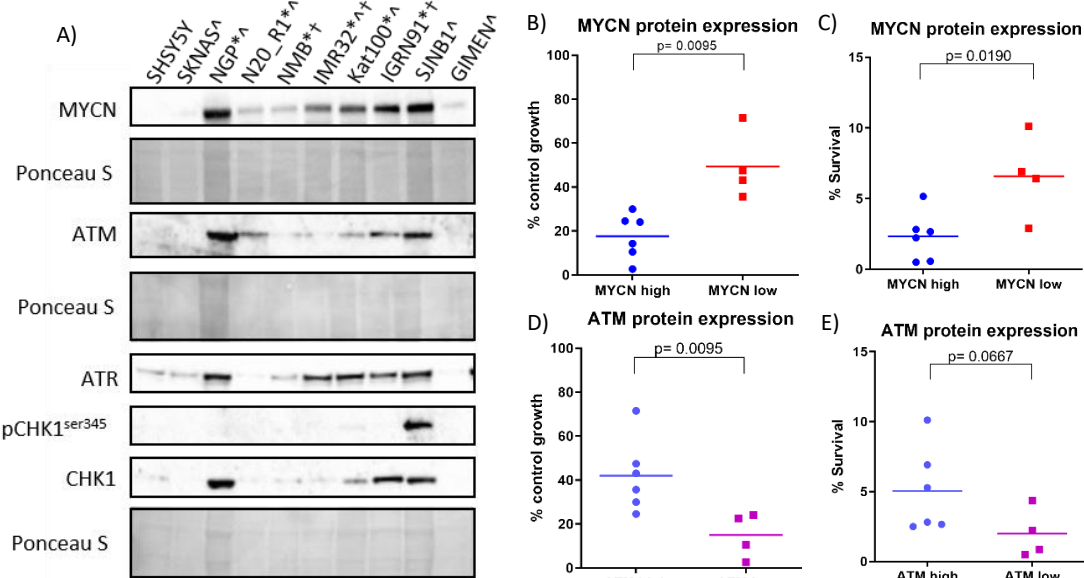

**Figure 1:** A) Representative Western blot images of baseline expression of MYCN, ATM, ATR, phospho-CHK1<sup>S345</sup> (marker of ATR activity) and CHK1 in 10 NB cell lines. \**MYCN* amplified, <sup>Δ</sup>11q deleted, † *ATM* mutant. Ponceau S stain was used as measure of total protein loading for control. Cell lines were split into 2 groups based on MYCN (B and C) or ATM (D and E) protein expression (Western blot). Average percentage control growth (XTT cell proliferation) and clonogenic survival at 10 μM VE-821 was plotted for cell lines belonging to each group (n=3).

### 2. ATR inhibition potentiates PARPi-induced growth inhibition and RS

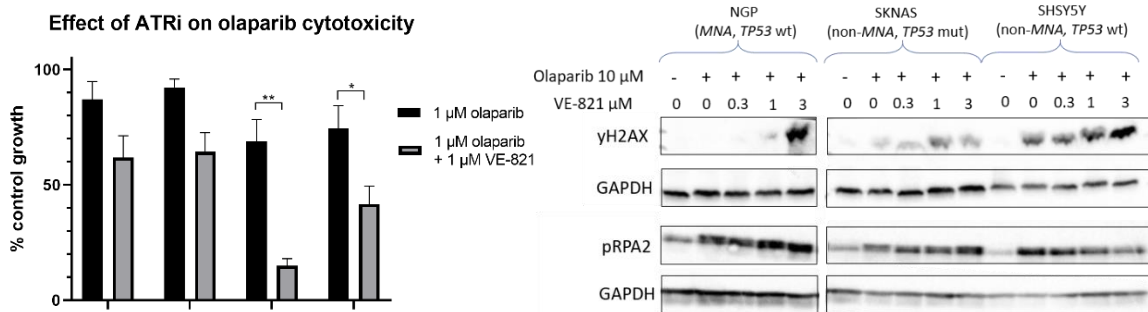

**Figure 2:** A) Effect of 1 μM VE-821 on cytotoxicity of 1 μM olaparib normalised to the effect of VE-821 alone. Data shown are the mean + SEM from 4 individual experiments. 2-way ANOVA: \**p*<0.05, \*\* *p*<0.01, C) Combination index (CI) values were calculated using CalcuSyn and plotted in B) Western blot analysis of γH2AX and phospho-RPA<sup>S8</sup> (pRPA2) in the NGP, SKNAS and SHSY5Y cell lines after treatment with 10 μM olaparib with and without 0.3, 1 or 3 μM VE-821 for 24 hours. GAPDH was used as a control for protein loading.

## Results

### 2. ATR inhibition potentiates PARPi-induced growth inhibition and RS (continued)

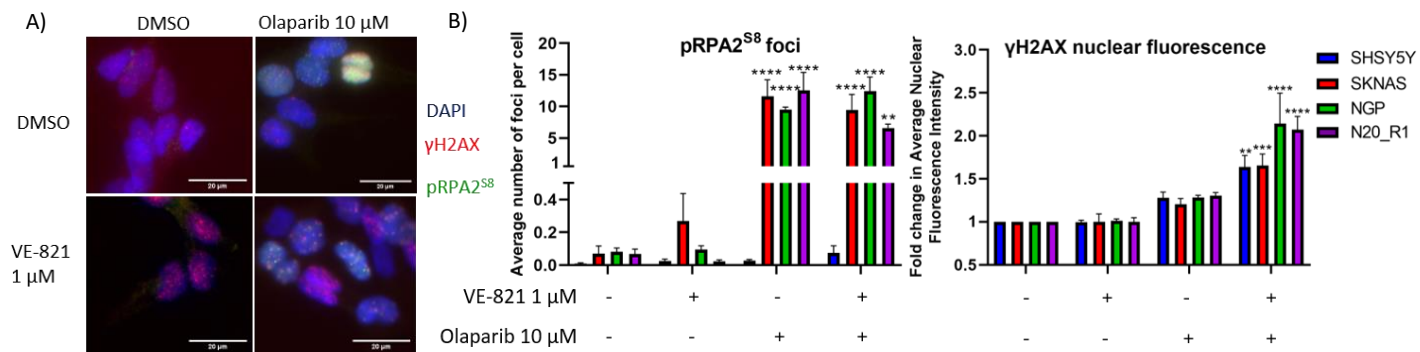

**Figure 3:** A) Representative γH2AX and pRPA2<sup>S8</sup>foci images from the NGP cell line treated with 1 μM VE-821, 10 μM olaparib or both for 24 hours. B) Average number of pRPA2<sup>S8</sup> and fold change in mean γH2AX total nuclear fluorescence intensity for SHSY5Y, SKNAS, NGP and N20\_R1 cell lines treated as in A. Data are mean + SEM from 3 independent experiments. \*\* *p*<0.01, \*\*\* *p*<0.001, \*\*\*\* *p*<0.0001, 2-way ANOVA difference from control (DMSO).

### 3. ATR inhibition reduces PARPi-induced HRR foci

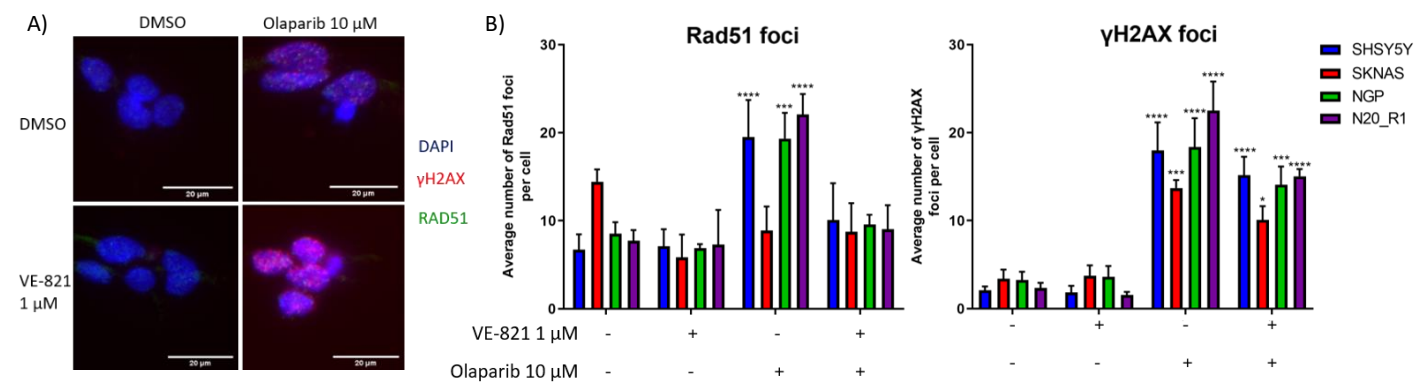

**Figure 4:** A) Representative γH2AX and Rad51 foci images from the NGP cell line treated with 1 μM VE-821, 10 μM olaparib or both for 24 hours. B) Average number of Rad51 and γH2AX foci per cell for SHSY5Y, SKNAS, NGP and N20\_R1 cell lines treated as in A. Data are mean + SEM from 4 independent experiments. \* *p*<0.05, \*\* *p*<0.01, \*\*\* *p*<0.001, \*\*\*\* *p*<0.0001, 2-way ANOVA difference from control (DMSO).

### 4. ATR inhibition abrogates PARPi-induced S and G2 arrest

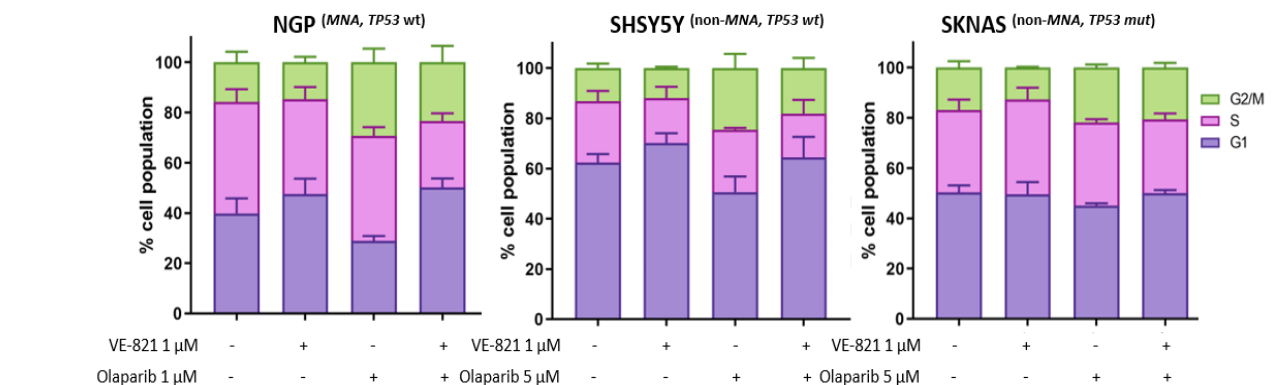

**Figure 5:** Cell cycle phase distribution of SHSY5Y, SKNAS and NGP cell lines treated with 5 μM (SHSY5Y and SKNAS) or 1 μM (NGP) olaparib in combination with 1 μM VE-821 for 24 h. Data are mean + SEM from 3 independent experiments. *MNA*: *MYCN* amplified, wt: wild type, mut: mutant

## Conclusions

- MYCN* overexpression and low *ATM* protein expression are determinants of ATRi sensitivity in NB cell lines.
- ATRi sensitises NB cells to PARPi by abrogating S/G2 checkpoint arrest and impairing HRR.
